# Supplementary material for: lncRNA-ES3/miR-34c-5p/BMF axis is involved in regulating high-glucose-induced calcification/senescence of VSMCs
Source: PubMed Central journal article supplement (PMC6366973; doi:10.18632/aging.101758), 2019-01-17
Supplement: aging-11-101758-s001.pdf [file aging-11-101758-s001.pdf]

## SUPPLEMENTARY MATERIAL

**Supplementary Table 1. Nucleotide sequences of primers used in the research**

| Gene       | Primer sequence (5' to 3')                                                                          |
|------------|-----------------------------------------------------------------------------------------------------|
| BMF        | Forward: CCACCAGCCAGGAAGACAAAG<br>Reverse: TGCTCCCAATGGGCAAGACT                                     |
| LncRNA-ES3 | Forward: ACAAGCCTGTTTGGTGGTC<br>Reverse: GCTGCCAGATGAGTTGAAC                                        |
| GAPDH      | Forward: GGAGCGAGATCCCTCCAAAAT<br>Reverse: GGCTGTTGTCATACTTCTCATGG                                  |
| miR-34c-5  | Forward: ACACTCCAGCTGGGAGGCAGTGTAGTTAGCT<br>Reverse: CTAAGTGGTGTCTGGAGTCGGCAATTCAGTTG<br>AGGCAATCAG |
| miR-34c-3p | Forward: ACACTCCAGCTGGGATCACTAACCACACG<br>Reverse: CTCAAGTGGTGTCTGGAGTCGGCAATTCAGTT<br>GAGCCTGGCCG  |
| U6snRNA    | Forward: CTCGCTTCGGCAGCACA<br>Reverse: AACGCTTCACGAATTTGCGT                                         |

**Supplementary Table 2. The sequence of siRNA used in the research**

| Name           | Sequence                                                                                                                                                               |
|----------------|------------------------------------------------------------------------------------------------------------------------------------------------------------------------|
| shlncRNA-ES3-1 | Sense:<br>5'-CACCGGTATCCTCTTAGACTCTCAATTCAAGAGATTGAGAGTCTAAGAGGATACCTTTTTTTG -3'<br>Antisense:<br>5'-GATCCAAAAAAGGTATCCTCTTAGACTCTCAATCTCTTGAATTGAGAGTCTAAGAGGATACC-3' |
| shlncRNA-ES3-2 | Sense:<br>5'-CACCGGTTTGGATGACAAATTCTGTTTCAAGAGAACAGAATTTGTCATCCAAACCTTTTTTTG -3'<br>Antisense:<br>5'-GATCCAAAAAAGGTTTGGATGACAAATTCTGTTCTCTTGAACAGAATTTGTCATCCAAACC -3' |
| shlncRNA-ES3-3 | Sense:<br>5'-CACCGGTTAGTTTCCACTAGAAAGTTTCAAGAGAACTTTCTAGTGGAAACTAACCTTTTTTTG-3'<br>Antisense:<br>5'-GATCCAAAAAAGGTTAGTTTCCACTAGAAAGTTCTCTTGAACCTTTCTAGTGGAAACTAACCC-3' |
| shlncRNA-ES3-4 | Sense:<br>5'-CACCGGTTAGTTTCCACTAGAAAGTTTCAAGAGAACTTTCTAGTGGAAACTAACCTTTTTTTG-3'<br>Antisense:<br>5'-GATCCAAAAAAGGTTAGTTTCCACTAGAAAGTTCTCTTGAACCTTTCTAGTGGAAACTAACCC-3' |
| siBMF          | Sense:<br>5'-AAGGUGUCAUGCUGCCUUGUTT-3'<br>Antisense:<br>5'-ACAAGGCAGCAUGACACCUUTT-3'                                                                                   |
